# Supplementary material for: Transfer of wild relative introgressions into durum from hexaploid wheat for exploitation in research and breeding
Source: Research Square preprint supplement (doi:10.21203/rs.3.rs-8261341/v1), 2025-12-16
Supplement: Supplementary file 1 [file da12df907b5a31cd9853a549.xlsx]

## Sheet: 1
	Supplementary Table 1. Details of KASP markers used to detect T. timopheevii introgressions from Chr 2G and Chr3G into durum wheat chromosomes 2B and 2G respectively in the durum introgression lines.
	KASP marker	Wheat Chr	Position on Svevo v1.0 (bp)	T. timopheevii Chr	Position of WRC_T. timopheevii v1.0 (bp)	Tim5	Tim5	Tim6	Tim6
						2G	3G	2G	3G
	WRC0197	2B	4167722	2G	6092968	+		-
	WRC1336	2B	204205699	2G	173746396	+		+
	WRC0215	2B	335368637	2G	275649021	+		+
	WRC0226	2B	446400895	2G	401709249	+		+
	WRC0232	2B	583055509	2G	510223042	+		+
	WRC0239	2B	623453705	2G	539809306	+		+
	WRC0339	3B	15428611	3G	15487364		+		+
	WRC2225	3B	43526863	3G	47520419		+		+
	WRC0367	3B	409497432	3G	354306165		-		+
	WRC2236	3B	773937398	3G	609238457		-		+

## Sheet: 2
	Supplementary table 2. Details of primers for KASP markers used to detect T. timopheevii introgressions from Chr 2G and Chr 3G
	into durum wheat chromosomes 2B and 3B respectively in the durum introgression lines.
	Marker ID	Primer_AlleleFAM	Primer_AlleleHEX	Primer_Common
	WRC0197	CACCAATCTGACCAGCCTTGG	CACCAATCTGACCAGCCTTGC	TCGGGCGTAACCTCGCTGTTTC
	WRC1336	GTTTCCTAGGCTCTTCGGATATGG	GTTTCCTAGGCTCTTCGGATATGA	ATAACGTGGTGTGATCAACAATG
	WRC0215	ATATGTTCGTTTTGAGTGTTGTTTGATGA	ATGTTCGTTTTGAGTGTTGTTTGATGG	GCAGATACACGATGGAGTGGACAAA
	WRC0226	ATTGCCAGTATAAAGGCAGGCAC	GCCAGTATAAAGGCAGGCAG	TAGTATTCCACCAGCCAAGGGGTAA
	WRC0232	GGGTATGGGAGAAAGAGAAACGC	GGGTATGGGAGAAAGAGAAACGG	STGACGTGACCTGAGCATAGGC
	WRC0239	TCTTCTCTTGCAGCAGATTCATGG	CTTCTCTTGCAGCAGATTCATGC	SGGTGTCTCCAAAGGGAGGCTT
	WRC0339	GCAGGGAGTTCAAATGGCACG	GGCAGGGAGTTCAAATGGCACA	AAGCTGCCAAAGATGGCATTCAAATACTT
	WRC2225	CTGAGTTTGGGAATAGCAGCC	CTGAGTTTGGGAATAGCAGCG	ACAGCCCGGAGAAGTTGTTC
	WRC0367	AAGGGTACATTGCCCTTCACAAGA	GGGTACATTGCCCTTCACAAGG	CCAAATTGGAGACAATAGYATTAGACGAG
	WRC2236	ACCTCCAAAGGAAGCATAGGT	ACCTCCAAAGGAAGCATAGGC	AAGGCCATGGTTCAGGTCTC

## Sheet: 3
	Supplemtary Table 3. Start and end bins (in Mb) of introgressions from T. timopheevii (Tt) chromosomes and the corresponding deletions in wheat chromosomes for all durum introgression lines (ILs) generated in this study.
	Ils	Tt Chr	Start bin	End bin	Size (Mb)	Wheat Chr	Start bin	End bin	Size (Mb)
	Tim5CD3	3G	0	60	52	3B	0	66	60
	Tim5CD4	3G	0	60	60	3B	0	66	66
	Tim6DT	3G	0	615	615	3B	0	777	777
